# Supplementary material for: Accelerating the “one-pot” melt polycondensation for thermotropic liquid crystalline polymers by introducing a second acetylating agent
Source: Royal Society of Chemistry journal article supplement (doi:10.1039/d5ra07423a), 2025-01-01

## Supplementary Information

### Accelerating the “one-pot” melt polycondensation for thermotropic liquid crystalline polymers by introducing a second acetylating agent

Hua Zeng, Xiaoyi Sun, Qian Li, Sheng Song

**Supplementary text** for characterization.

**Supplementary figure-1**  $^1\text{H}$  NMR of PGAc, PO, and their mixture at room temperature.

**Supplementary figure-2**  $^1\text{H}$  NMR of POAc.

**Supplementary figure-3** IR absorption spectrum of Vectra A950.

**Supplementary figure-4** (a) TGA, and (b) DTG of TLCPs prepared by adding PGAc, HQAc, RCAC, and BPAC without catalyst.

**Supplementary figure-5** (a) the second heating curves, and (b) the first cooling curves from DSC of TLCPs prepared by adding PGAc, HQAc, RCAC, and BPAC without catalyst.

**Some related  $^1\text{H}$  NMR spectra.**

**Supplementary text** for characterization.

$^1\text{H}$  nuclear magnetic resonance ( $^1\text{H}$  NMR) spectra and fourier transform infrared (FTIR) spectroscopy were used to analyze the structure of products.  $\text{DMSO-}d^6$  was used as the testing solvent. FTIR was obtained by total internal reflection with 64 scans and a wavenumber range of  $4000\text{ cm}^{-1}$  to  $400\text{ cm}^{-1}$ . 100 mg of TLCP was added to a three-necked round-bottom flask containing 50 mL of pentafluorophenol and dissolved at  $80\text{ }^\circ\text{C}$  for 4 h to obtain a homogeneous solution. The solution was subjected to hot filtration, and the filtrate was placed in an Ubbelohde viscometer and maintained at  $60\text{ }^\circ\text{C}$  for 30 min. The outflow time of the solution was tested and compared with that of pure pentafluorophenol solvent to calculate the intrinsic viscosity ( $[\eta]$ ) of TLCP.

Thermogravimetric analysis (TGA) and differential scanning calorimetry (DSC) analysis were used to study thermal performance of TLCP. After drying in vacuum, TLCP was heated from  $100\text{ }^\circ\text{C}$  to  $800\text{ }^\circ\text{C}$  at a rate of  $20\text{ }^\circ\text{C}/\text{min}$  under nitrogen, and TGA, DTG curves as well as related data were obtained. TLCP was heated to  $350\text{ }^\circ\text{C}$  at a rate of  $10\text{ }^\circ\text{C}/\text{min}$  in a nitrogen atmosphere. After 5 min of constant temperature, the temperature was reduced to  $50\text{ }^\circ\text{C}$  at a rate of  $10\text{ }^\circ\text{C}/\text{min}$  to obtain crystallization point ( $T_c$ ). Maintain a constant temperature for 5 min, the temperature was raised at a rate of  $10\text{ }^\circ\text{C}/\text{min}$  to  $350\text{ }^\circ\text{C}$  to obtain melting point ( $T_m$ ).

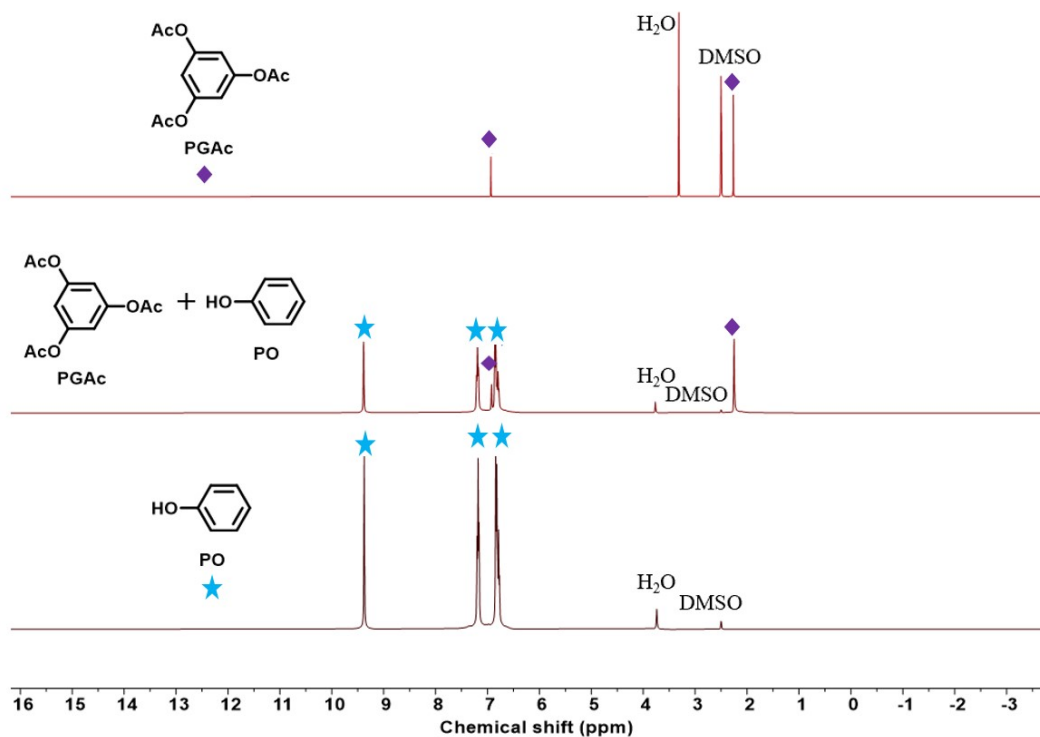

**Supplementary figure-1**  $^1\text{H}$  NMR of PGAc, PO, and their mixture at room temperature (400 MHz, DMSO- $d^6$ ).

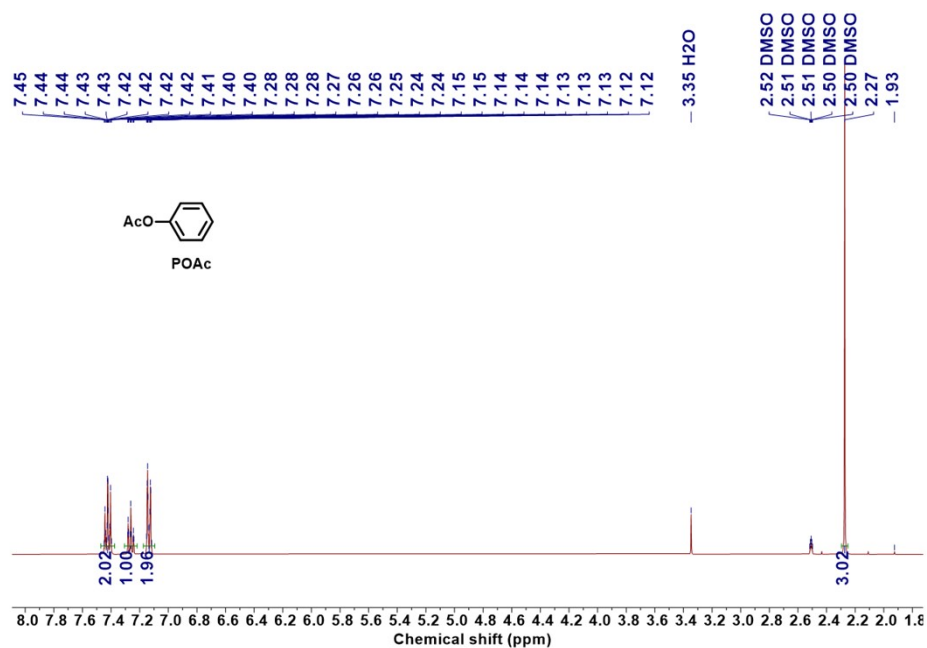

**Supplementary figure-2**  $^1\text{H}$  NMR of POAc (400 MHz, DMSO- $d^6$ ).

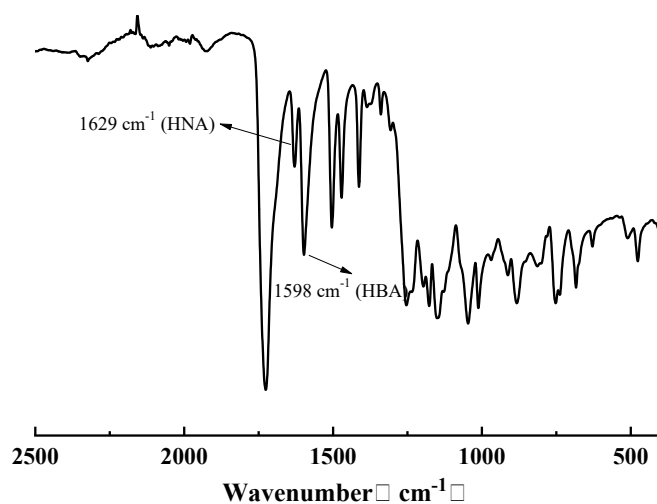

**Supplementary figure-3** IR absorption spectrum of Vectra A950.

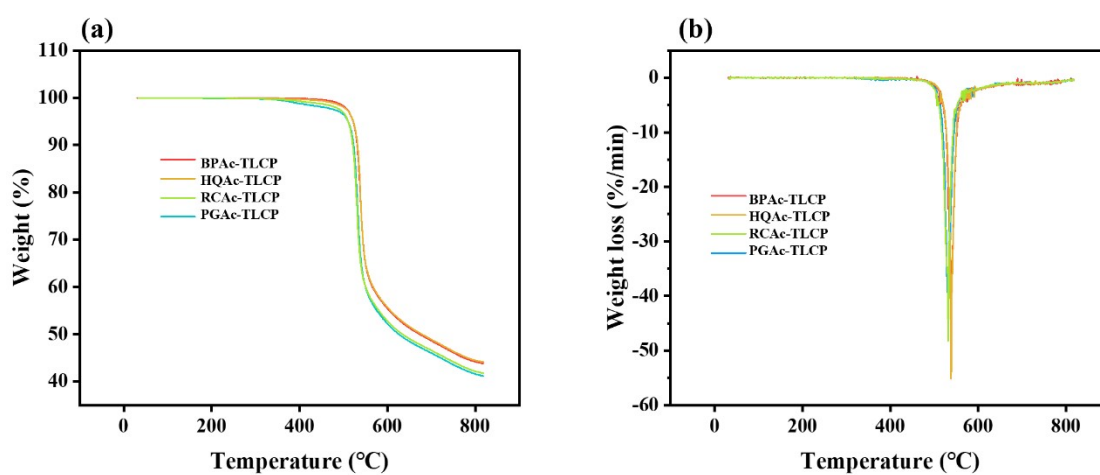

**Supplementary figure-4** (a) TGA, and (b) DTG of TLCPs prepared by adding PGAc, HQAc, RCAC, and BPAC without catalyst.

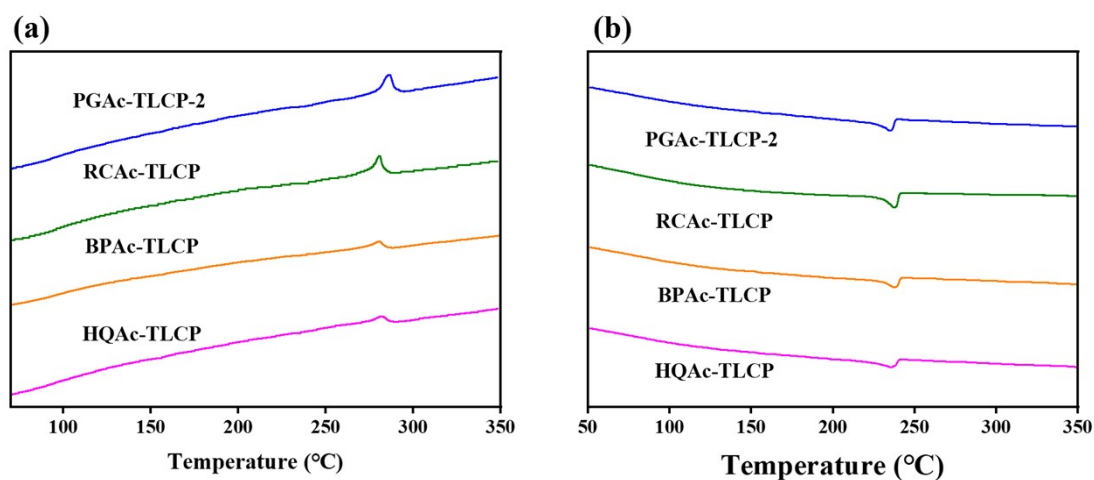

**Supplementary figure-5** (a) the second heating curves, and (b) the first cooling curves from DSC of TLCPs prepared by adding PGAc, HQAc, RCAC, and BPAC without catalyst.

PGAc (400 MHz, DMSO-*d*<sup>6</sup>)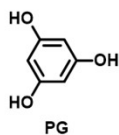

7.72  
7.71  
7.71  
7.69  
7.69  
7.68  
7.25  
7.24  
7.23  
7.22  
7.22  
7.21

— 3.34 H<sub>2</sub>O

2.52 DMSO  
2.51 DMSO  
2.51 DMSO  
2.50 DMSO  
2.50 DMSO  
2.30

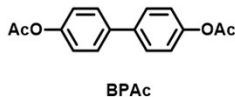RCAc (400 MHz, DMSO-*d*<sup>6</sup>)

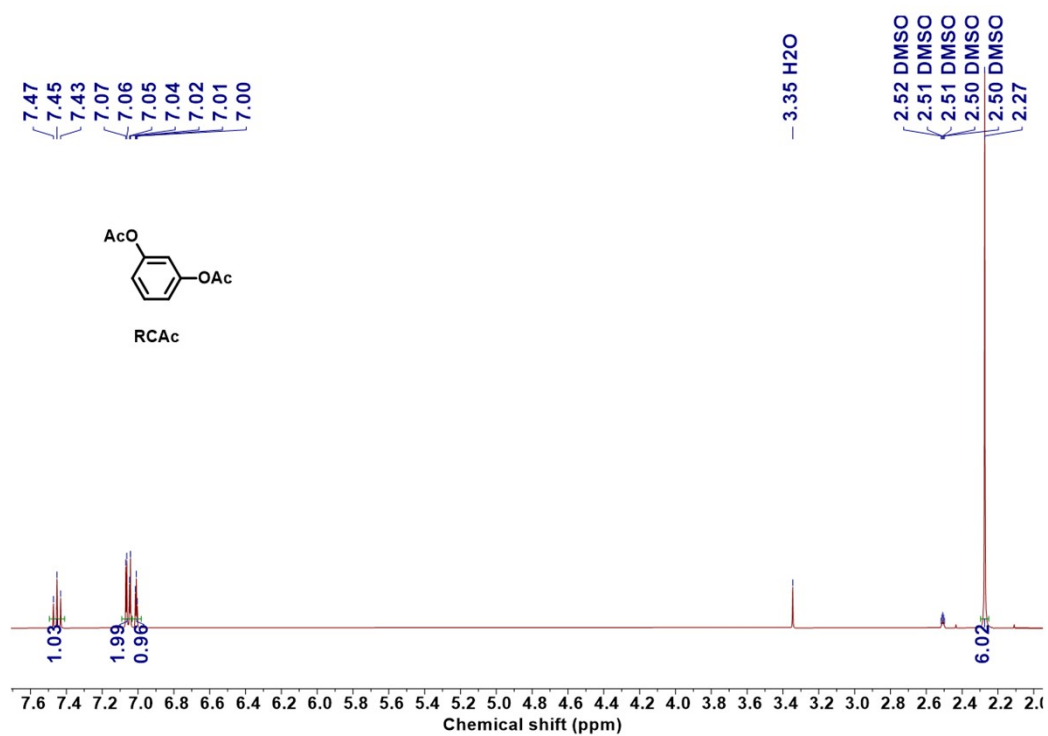

HQAc (400 MHz, DMSO-*d*<sup>6</sup>)

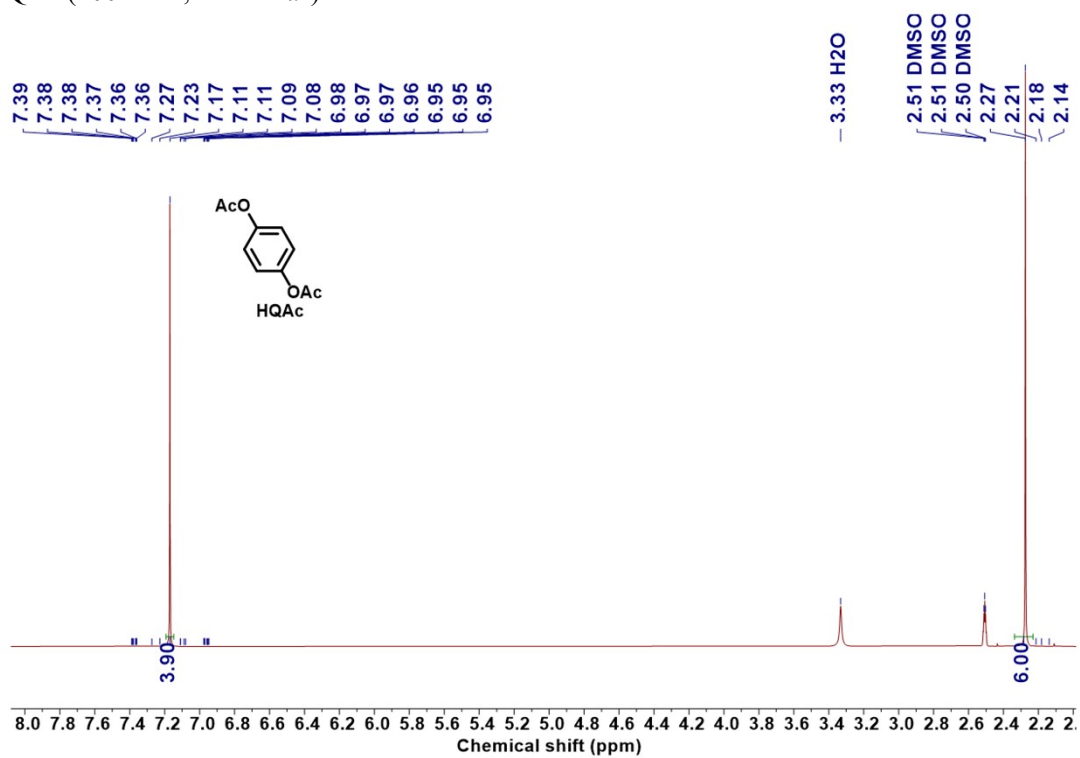

Supplement: d5ra07423a1.pdf [file d5ra07423a1.pdf]
